# Supplementary material
Source: Springer Nature journal article supplement (https://www.springermedizin.de/resource/supplementary/12933_2014_841_MOESM8_ESM.pdf/9539368)

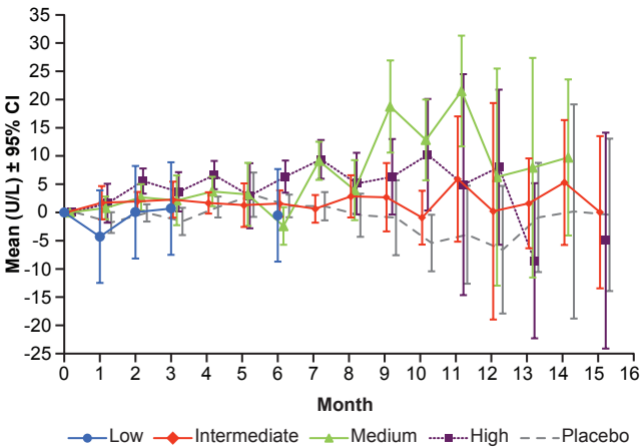

Supplement: MOESM8 [file 9539368]
